# Supplementary material for: Highly efficient Ni–Mn/SiO2catalyst for the selective hydrogenation of biomass-derived levulinic acid to γ-valerolactone under mild conditions
Source: Royal Society of Chemistry journal article supplement (doi:10.1039/d3nj01010d), 2023-01-01
Supplement: d3nj01010d1.pdf [file d3nj01010d1.pdf]

Supporting Information for

**Highly efficient Ni-Mn/SiO<sub>2</sub> catalyst for the selective hydrogenation of biomass-derived levulinic acid to  $\gamma$ -valerolactone under mild conditions**

Mengting Chen<sup>a</sup>, Qifeng Zhong<sup>a</sup>, Jiao Ma<sup>a</sup>, Zhiyang Zhang<sup>a</sup>, Yingxin Liu<sup>a,c,\*</sup>, Zuojun Wei<sup>b,\*</sup>,  
Shuguang Deng<sup>c,\*</sup>

<sup>a</sup> College of Pharmaceutical Science, Zhejiang University of Technology, Hangzhou 310014, China

<sup>b</sup> Key Laboratory of Biomass Chemical Engineering of the Ministry of Education, College of Chemical and Biological Engineering, Zhejiang University, Hangzhou 310027, China

<sup>c</sup> School for Engineering of Matter, Transport and Energy, Arizona State University, 551 E. Tyler Mall, Tempe, AZ 85287, USA

\* Corresponding authors

*E-mail address:* yxliu@zjut.edu.cn (Y.-X. Liu), weizuojun@zju.edu.cn (Z.-J. Wei), Shuguang.Deng@asu.edu (S.-G. Deng).

## Experimental section

**Catalyst characterization.** Brunauer-Emmett-Teller (BET) surface areas of the catalysts were measured by pulsed N<sub>2</sub> adsorption-desorption method at -196 °C using Micromeritics ASAP 2460 analyzer. Prior to N<sub>2</sub> physisorption, the samples were degassed under vacuum at 250 °C for 3 h. H<sub>2</sub> temperature-programmed reduction (H<sub>2</sub>-TPR) of the samples was performed on a FINESORB-3010 temperature programmed chemisorption instrument. About 100 mg of the dried catalyst samples were preheated at 150 °C under N<sub>2</sub> for 2 h, cooled to room temperature, and then reduced in the temperature range from room temperature to 900 °C at a heating rate of 10 °C·min<sup>-1</sup> under a gaseous mixture of 10 vol% hydrogen in N<sub>2</sub>. Hydrogen consumption was monitored on a thermal conductivity detector (TCD). Transmission electron microscopy (TEM) and high-angle annular dark-field scanning transmission electron microscope (HAADF-STEM) images were obtained using a Tecnai G2 F30 S-Twin instrument (FEI Co., USA) operated at an accelerating voltage of 300 kV. Particle size distribution of metal nanoparticles in each sample was determined from the corresponding TEM image by measuring the sizes of about 100 particles. X-ray photoelectron spectroscopy (XPS) spectra were obtained using an Escalab Mark II X-ray spectrometer (VG Co., United Kingdom) equipped with a magnesium anode (MgK $\alpha$ =1253.6 eV). Energy corrections were performed using a 1s peak of the pollutant carbon at 284.6 eV. The leaching of the catalysts was measured by using a PerkinElmer Optima 8000 spectrometer exploiting Inductively Coupled Plasma Optical Emission Spectrometry (ICP-OES). H<sub>2</sub> pulse chemisorption was performed using a Micromeritics ASAP 2020. Typically, 50 mg catalyst was loaded into a quartz U-tube reactor and reduced at 500 °C for 3 h. Subsequently, H<sub>2</sub> molecules were statically adsorbed at 35 °C. Ammonia temperature-programmed desorption analysis (NH<sub>3</sub>-TPD) was performed on a chemisorption analyzer connected with a Hiden QIC-20 mass spectrometer analysis instrument (Hiden Analytical Ltd., United Kingdom). About 100 mg of

the dried sample was reduced at 500 °C for 3 h under a gaseous mixture of 10 vol% hydrogen in N<sub>2</sub>, and then cooled down and swept with a gaseous mixture of 5 vol% NH<sub>3</sub> in N<sub>2</sub> at 50 °C for NH<sub>3</sub> adsorption. After adsorption equilibrium, the excess NH<sub>3</sub> was flushed at 50 °C with N<sub>2</sub> for 30 min. And then the sample was heated to 800 °C at a rate of 10 °C·min<sup>-1</sup> and the signal of the outlet gas was recorded by TCD. The pyridine adsorbed FT-IR spectroscopy of the reduced sample was conducted on a Tensor 27 after the sample was well pressed into a wafer, followed by moving into the infrared quartz cell. The sample were additionally pre-treated for 2 h at 500 °C under a vacuum condition. Upon cooled to 120 °C, pyridine was flowed into the cell, while the spectra were recorded after pyridine was desorbed for 15 min at 50, 150 and 250 °C.

**Table S1** Labels and calculated metal contents of catalysts

| Catalyst Label              | Ni (wt.%) | Mn (wt.%) | Ni/Mn (mol/mol) |
|-----------------------------|-----------|-----------|-----------------|
| Ni/SiO <sub>2</sub>         | 2.0       | 0         | N/A             |
| Ni-Mn(3:1)/SiO <sub>2</sub> | 2.0       | 0.6       | 3               |
| Ni-Mn(2:1)/SiO <sub>2</sub> | 2.0       | 0.9       | 2               |
| Ni-Mn(1:1)/SiO <sub>2</sub> | 2.0       | 1.9       | 1               |
| Mn/SiO <sub>2</sub>         | 0         | 2.0       | 0               |

**Table S2** Textural and structural properties of Ni/SiO<sub>2</sub> and Ni-Mn(2:1)/SiO<sub>2</sub>

| Sample                      | Surface area (m <sup>2</sup> /g) <sup>a</sup> | Ni diameter (nm) <sup>b</sup> | Ni dispersion (%) <sup>c</sup> |
|-----------------------------|-----------------------------------------------|-------------------------------|--------------------------------|
| SiO <sub>2</sub>            | 287                                           | /                             | /                              |
| Ni/SiO <sub>2</sub>         | 192                                           | 3.61                          | 0.67                           |
| Ni-Mn(2:1)/SiO <sub>2</sub> | 175                                           | 2.21                          | 1.16                           |

<sup>a</sup> Measured by nitrogen adsorption.

<sup>b</sup> Determined by TEM.

<sup>c</sup> Determined by H<sub>2</sub> chemisorption.

**Table S3** XPS relative quantitative analysis of Ni/SiO<sub>2</sub> and Ni-Mn(2:1)/SiO<sub>2</sub> catalysts

| Catalyst                    | Surface Ni (0)                                              |          | Surface Ni (II)                                |          |
|-----------------------------|-------------------------------------------------------------|----------|------------------------------------------------|----------|
|                             | B.E. <sup>a</sup> 2p <sub>3/2</sub> /2p <sub>1/2</sub> (eV) | Area (%) | B.E. 2p <sub>3/2</sub> /2p <sub>1/2</sub> (eV) | Area (%) |
| Ni/SiO <sub>2</sub>         | 851.8/869.3                                                 | 36.5     | 854.5/871.6                                    | 63.5     |
| Ni-Mn(2:1)/SiO <sub>2</sub> | 852.1/869.5                                                 | 37.8     | 854.8/871.9                                    | 62.2     |

<sup>a</sup> Abbreviation of binding energy.

**Table S4** Acid property of Ni-Mn(2:1)/SiO<sub>2</sub> catalyst as calculated by FT-IR spectra

| Temperature<br>(°C) | W<br>(mg) | Area of absorption peak         |                           | Amount of acid (μmol·g <sup>-1</sup> ) |               |               |      |
|---------------------|-----------|---------------------------------|---------------------------|----------------------------------------|---------------|---------------|------|
|                     |           | Assigned to<br>Brønsted<br>acid | Assigned to<br>Lewis acid | Brønsted<br>acid                       | Lewis<br>acid | Total<br>acid | B/L  |
| 50                  | 19.2      | 0.024                           | 1.069                     | 1.0                                    | 33.4          | 34.4          | 0.03 |
| 150                 | 19.2      | 0.013                           | 0.847                     | 0.5                                    | 26.5          | 27.0          | 0.02 |
| 250                 | 19.2      | 0.008                           | 0.306                     | 0.3                                    | 9.5           | 9.9           | 0.03 |

**Table S5** Catalytic performance of different Ni-based catalysts in hydrogenation of LA to GVL<sup>a</sup>

| Entry | Catalyst                    | LA conv. (%) <sup>b</sup> | GVL yield (%) <sup>b</sup> |
|-------|-----------------------------|---------------------------|----------------------------|
| 1     | Ni/SiO <sub>2</sub>         | 22.3                      | 22.3                       |
| 2     | Ni-V(1:1)/SiO <sub>2</sub>  | 4.0                       | 4.0                        |
| 3     | Ni-Zr(1:1)/SiO <sub>2</sub> | 21.9                      | 21.9                       |
| 4     | Ni-Mn(1:1)/SiO <sub>2</sub> | 64.7                      | 64.7                       |

<sup>a</sup>Reaction conditions: 4.3 mmol LA, 0.1 g catalyst, 10 mL 1,4-dioxane, 2 MPa H<sub>2</sub>, 180 °C, 0.5

h. <sup>b</sup>Determined by gas chromatography equipped with a flame ionization detector (FID) using *n*-dodecane as an internal standard.



**Table S6** Effect of different calcination temperatures on the performance of Ni-Mn(2:1)/SiO<sub>2</sub> for hydrogenation of LA to GVL<sup>a</sup>

| Entry | Calcination temperature (°C) | LA conv. (%) <sup>b</sup> | GVL yield (%) <sup>b</sup> |
|-------|------------------------------|---------------------------|----------------------------|
| 1     | No calcination               | 100                       | 100                        |
| 2     | 300                          | 96.8                      | 96.8                       |
| 3     | 400                          | 90.2                      | 90.2                       |
| 4     | 500                          | 74.5                      | 74.5                       |

<sup>a</sup>Reaction conditions: 4.3 mmol LA, 0.1 g catalyst, 10 mL 1,4-dioxane, 2 MPa H<sub>2</sub>, 180 °C, 2

h. <sup>b</sup>Determined by gas chromatography equipped with a flame ionization detector (FID) using *n*-dodecane as an internal standard.

**Table S7** Effect of different solvents on hydrogenation of LA to GVL over Ni-Mn(2:1)/SiO<sub>2</sub><sup>a</sup>

| Entry | Solvent          | LA conv. (%) <sup>b</sup> | Sel. (%) <sup>b</sup> |      |
|-------|------------------|---------------------------|-----------------------|------|
|       |                  |                           | GVL                   | HPA  |
| 1     | 1,4-Dioxane      | 100                       | 100                   | /    |
| 2     | Isopropanol      | 83.8                      | 100                   | /    |
| 3     | Tetrahydrofuran  | 100                       | 97.3                  | 2.7  |
| 4     | Toluene          | 68.4                      | 89.0                  | 11.0 |
| 5     | H <sub>2</sub> O | /                         | /                     | /    |

<sup>a</sup>Reaction conditions: 4.3 mmol LA, 0.1 g catalyst, 10 mL solvent, 2 MPa H<sub>2</sub>, 180 °C, 2 h.

<sup>b</sup>Determined by gas chromatography equipped with a flame ionization detector (FID) using *n*-dodecane as an internal standard.

**Table S8** Hydrogenation of LA to GVL over various catalytic systems

| Catalyst                                                        | H <sub>2</sub> pressure (MPa) | Temperature (°C) | Time (h) | GVL Yield (%) | TOF <sup>a</sup> (h <sup>-1</sup> ) | Ref.      |
|-----------------------------------------------------------------|-------------------------------|------------------|----------|---------------|-------------------------------------|-----------|
| 7.9 wt.% Ni/Al <sub>2</sub> O <sub>3</sub> -CN-600              | 1                             | 130              | 3        | >99           | 9.6                                 | 1         |
| 0.14 wt.% Ru/TiO <sub>2</sub> @CN                               | 6                             | 30               | 13       | 100           | 277.7                               | 2         |
| 1 wt.% Co <sub>0.5</sub> Re <sub>0.5</sub> /TiO <sub>2</sub>    | 1.5                           | 180              | 4        | 99.3          | 437                                 | 3         |
| 15%Ni-15%Co/Al <sub>2</sub> O <sub>3</sub>                      | 3                             | 110              | 3        | 99.5          | 3.6                                 | 4         |
| Ni-Mo/C                                                         | 10                            | 200              | 2        | 100           | 2.5                                 | 5         |
| 43.1 wt.% Ni <sub>0.58</sub> -Sn <sub>0.42</sub> /AlOH          | 4                             | 120              | 2        | >99           | 4.7                                 | 6         |
| 40 wt.% Ni/MgAlO <sub>2.5</sub>                                 | 3                             | 160              | 1        | 99.7          | 12.6                                | 7         |
| 14.5 wt.% 2-Ni/C-400                                            | 4                             | 160              | 3        | 94.5          | 5.2                                 | 8         |
| Ni-MoO <sub>x</sub> /C                                          | 0.8                           | 140              | 5        | 97            | 19.4                                | 9         |
| 6.3 wt.% Ni@NCMs-700                                            | 3                             | 200              | 4        | 98            | 16.0                                | 10        |
| 15 wt.% Ni/γ-Al <sub>2</sub> O <sub>3</sub>                     | 5                             | 200              | 4        | 92            | 11.0                                | 11        |
| 2.0 wt.% Fe-Re(1:2)/TiO <sub>2</sub>                            | 4                             | 180              | 4        | 95            | 57.7                                | 12        |
| 20 wt.% Ni <sub>3</sub> Fe NPs@C                                | 2                             | 130              | 2        | 89.6          | 17.6                                | 13        |
| 40 wt.% Ni/Al <sub>2</sub> O <sub>3</sub>                       | 3                             | 180              | 2        | 99.2          | 10.2                                | 14        |
| Cu/ZrO <sub>2</sub> -dp                                         | 3                             | 150              | 5        | >99           | 5.5                                 | 15        |
| 26 wt.% CuPS-R <sub>350</sub> -C <sub>8</sub> -R <sub>350</sub> | 1.2                           | 130              | 12       | 85.2          | 1.8                                 | 16        |
| 0.85 wt.% Ru/ZrO <sub>2</sub> @C                                | 1                             | 140              | 2        | 99            | 495                                 | 17        |
| 34.4 wt.% Cu/ZrO <sub>2</sub> -Al <sub>2</sub> O <sub>3</sub>   | 3                             | 130              | 5        | 100           | 1.8                                 | 18        |
| Ru/TiO <sub>2</sub> -n                                          | 3                             | 30               | 8        | >99           | 41.5                                | 19        |
| 18.4 wt.% Cu/ZrO <sub>2</sub>                                   | 3                             | 200              | 5        | 100           | 3.4                                 | 20        |
| 2.0 wt.% Ru/FLG                                                 | 4                             | 20               | 12       | 99.7          | 365                                 | 21        |
| 82.4 wt.% Co/Al <sub>2</sub> O <sub>3</sub>                     | 5                             | 180              | 3        | >99           | 41.7                                | 22        |
| Cu-ZrO <sub>2</sub> (1:1)                                       | 3.4                           | 200              | 5        | >99.9         | 2.5                                 | 23        |
| 5 wt.% Pd/MCM-41                                                | 6                             | 240              | 10       | 96.3          | 52.9                                | 24        |
| 0.5 wt.% Ru-5 wt.% Ni/MMT                                       | 1.7                           | 220              | 5        | 91            | 137.6                               | 25        |
| 13.3 wt.% Ni-8.9 wt.% Cu/Al <sub>2</sub> O <sub>3</sub>         | 6.5                           | 250              | 5        | 96            | 17.9                                | 26        |
| 2 wt.% Ni-Mn(2:1)/SiO <sub>2</sub>                              | 2                             | 180              | 2        | 100           | 190.2                               | This work |
| 2 wt.% Ni-Mn(2:1)/SiO <sub>2</sub>                              | 2                             | 140              | 5.5      | 100           | 27.0                                | This work |

<sup>a</sup>Turnover frequency (TOF, h<sup>-1</sup>) is defined as moles of target product formed/total moles of metal active sites per hour.

**Table S9** Metal contents of Ni-Mn(2:1)/SiO<sub>2</sub> catalyst determined with ICP-OES.

| Catalyst                           | Ni (wt.%) | Mn (wt.%) |
|------------------------------------|-----------|-----------|
| Fresh Ni-Mn(2:1)/SiO <sub>2</sub>  | 1.98      | 0.88      |
| Reused Ni-Mn(2:1)/SiO <sub>2</sub> | 1.86      | 0.82      |

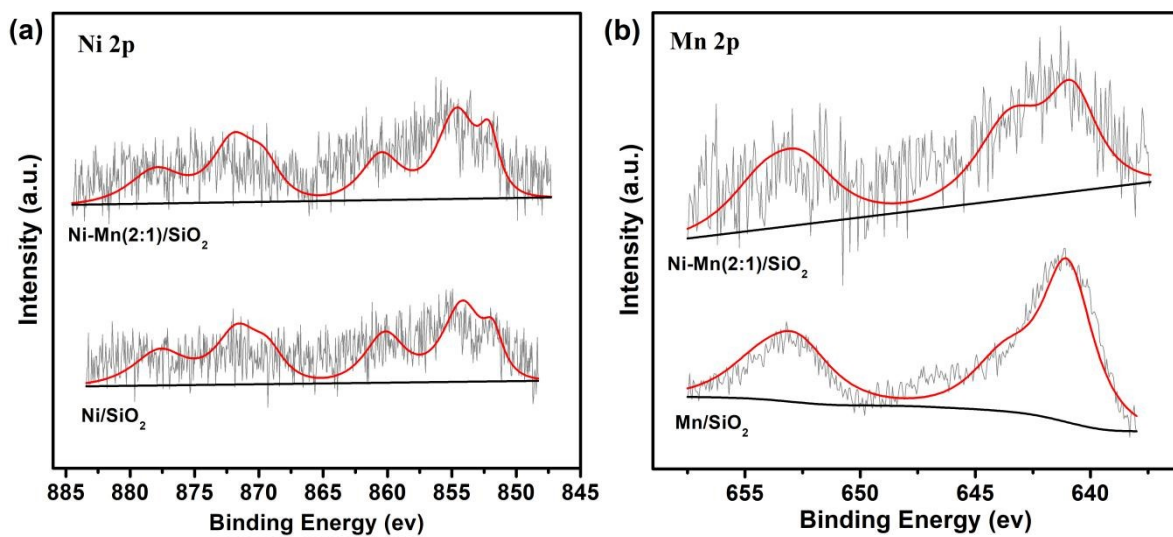

**Fig. S1** The original XPS spectra of (a) Ni 2p and (b) Mn 2p of the reduced catalysts Ni/SiO<sub>2</sub>, Mn/SiO<sub>2</sub> and Ni-Mn(2:1)/SiO<sub>2</sub>.

## References

- 1 L. Jiang, G.-Y. Xu and Y. Fu, *Green Chem.* 2021, **23**, 7065-7073.
- 2 K.-L. Zhang, Q.-L. Meng, H.-H. Wu, T.-Y. Yuan, S.-T. Han, J.-X. Zhai, B.-X. Zheng, C.-Y. Xu, W.-Wu, M.-Y. He and B.-X. Han, *Green Chem.* 2021, **23**, 1621-1627.
- 3 Z.-J. Wei, Q. Li, Y.-R. Cheng, M. Dong, Z.-Y. Zhang, X.-M. Zhu, Y.-X. Liu and Y. Sun, *ACS Sustainable Chem. Eng.* 2021, **9**, 10882-10891.
- 4 J. Bai, C.-W. Cheng, Y. Liu, C.-G. Wang, Y.-H. Liao, L.-G. Chen and L.-L. Ma, *Mol. Catal.* 2021, **516**, 112000.
- 5 B. P. Pinto, A. L. L. Fortuna, C. P. Cardoso and C. J. A. Mota, *Catal. Lett.* 2017, **147**, 751-757.
- 6 R. Rodiansono, M. D. Astuti, T. Hara, N. Ichikuni and S. Shimazu, *Catal. Sci. Technol.* 2016, **6**, 2955-2961.
- 7 K. Jiang, D. Sheng, Z.-H. Zhang, J. Fu, Z.-Y. Hou and X.-Y. Lu, *Catal. Today* 2016, **274**, 55-59.
- 8 S.-Q. Fang, Z.-B. Cui, Y.-T. Zhu, C.-G. Wang, J. Bai, X.-H. Zhang, Y.-Xu, Q.-Y. Liu, L.-G. Chen, Q. Zhang and L.-L. Ma, *J. Energy Chem.* 2019, **37**, 204-214.
- 9 K. Shimizu, S. Kanno and K. Kon, *Green Chem.* 2014, **16**, 3899-3903.
- 10 D.-W. Liu, L.-N. Zhang, W.-P. Han, M.-X. Tang, L.-G. Zhou, Y. Zhang, X.-K. Li, Z.-F. Qin and H.-Q. Yang, *Chem. Eng. J.* 2019, **369**, 386-393.
- 11 K. Hengst, M. Schubert, H. W. P. Carvalho, C.-B. Lu, W. Kleist and J. D. Grunwaldt, *Appl. Catal. A Gen.* 2015, **502**, 18-26.
- 12 X.-M. Huang, K.-T. Liu, W. L. Vrijburg, X.-H. Ouyang, A. I. Dugulan, Y.-X. Liu, M. W. G. M. T. Verhoeven, N. A. Kosinov, E. A. Pidko and E. J. M. Hensen, *Appl. Catal. B Environ.* 2020, **278**, 19314.
- 13 H.-J. Wang, C. Chen, H.-M. Zhang, G.-Z. Wang and H.-J. Zhao, *Chinese J. Catal.* 2018, **39**, 1599-1607.
- 14 J. Fu, D. Sheng and X.-Y. Lu, *Catalysts*, 2016, **6**, 6.
- 15 Z.-Y. Li, H.-G. Hao, J.-J. Lu, C.-M. Wu, R. Gao, J.-F. Li, C.-L. Liu and W.-S. Dong, *J. Energy Chem.* 2021, **61**, 446-458.
- 16 Y.-J. Tsou, T.-D. To, Y.-C. Chiang, J.-F. Lee, R.-J. Kumar, P.-W. Chung and Y.-C. Lin,

- ACS Appl. Mater. Interfaces*, 2020, **12**, 54851-54861.
- 17 W.-X. Cao, W.-H. Luo, H.-G. Ge, Y. Su, A.-Q. Wang and T. Zhang, *Green Chem.* 2017, **19**, 2201-2211.
  - 18 J.-F. Li, M.-J. Li, C.-X. Zhang, C.-L. Liu, R.-Z. Yang and W.-S. Dong, *J. Catal.* 2020, **381**, 163-174.
  - 19 S.-P. Li, Y.-Y. Wang, Y.-D. Yang, B.-F. Chen, J. Tai, H.-Z. Liu and B.-X. Han, *Green Chem.* 2019, **21**, 770-774.
  - 20 J.-F. Li, L. Zhao, J.-L. Li, M.-J. Li, C.-L. Liu, R.-Z. Yang and W.-S. Dong, *Appl Catal. A Gen.* 2019, **587**, 117244.
  - 21 C.-X. Xiao, T. W. Goh, Z.-Y. Qi, S. N. Goes, K. Brashler, C. Perez and W.-Y. Huang, *ACS Catal.* 2016, **6**, 593-599.
  - 22 X.-D. Long, P. Sun, Z.-L. Li, R. Lang, C.-G. Xia and F.-W. Li, *Chinese J. Catal.* 2015, **36**, 1512-1518.
  - 23 A. M. Hengne and C. V. Rode, *Green Chem.* 2012, **14**, 1064-1072.
  - 24 K. Yan, T. Lafleur, C. Jarvis and G.-S. Wu, *J. Clean. Prod.* 2014, **72**, 230-232.
  - 25 G. B. Kasar, R. S. Medhekar, P. N. Bhosale and C. V. Rode, *Ind. Eng. Chem. Res.* 2019, **58**, 19803-19817.
  - 26 I. Obregón, E. Corro, U. Izquierdo, J. Requies and P. L. Arias, *Chinese J. Catal.* 2014, **35**, 656-662.
